# Supplementary material for: Preparation, Identification and Preliminary Application of the Fenvalerate Monoclonal Antibody in Six Kinds of Dark Tea
Source: MDPI journal article supplement (doi:10.3390/foods12051091), 2023-03-03
Supplement: s1 [file s1]

## Supplementary Materials

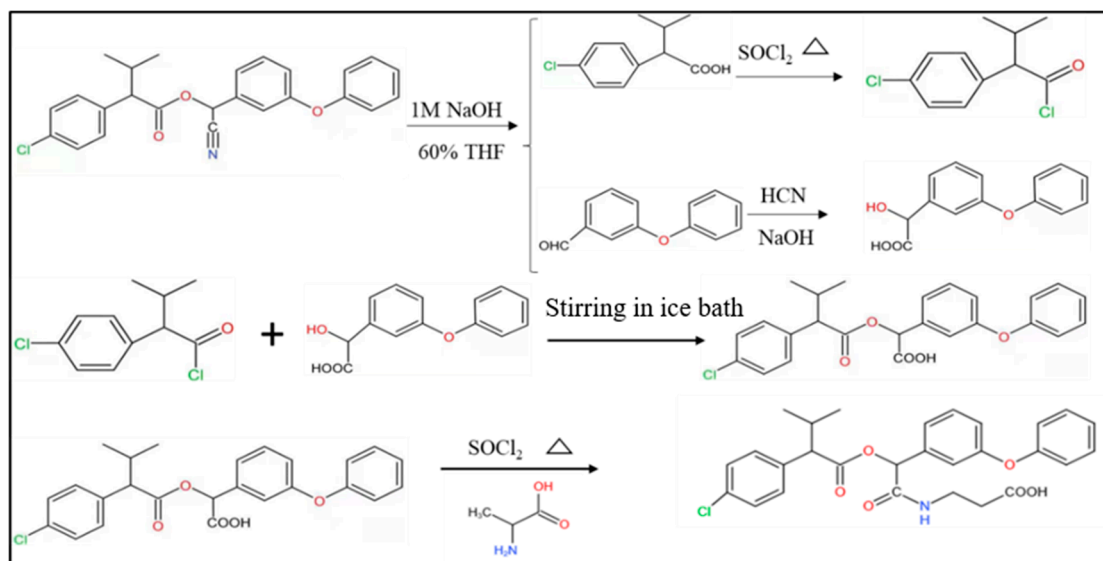

**Figure S1.** The synthetic procedure of Fen hapten.

**Table S1.** Titer determination of fenvalerate monoclonal antibody (McAb).

| Antibody<br>number | Dilution ratio of McAb |       |       |       |        |        |         |          |
|--------------------|------------------------|-------|-------|-------|--------|--------|---------|----------|
|                    | 3000                   | 9000  | 27000 | 81000 | 243000 | 729000 | 2187000 | negative |
| 1B6                | 3.912                  | 3.845 | 3.73  | 3.45  | 1.633  | 1.269  | 0.554   | 0.175    |
| 2A11               | 3.971                  | 3.946 | 3.757 | 3.342 | 2.245  | 1.046  | 0.551   | 0.202    |
| 5G2                | 3.938                  | 3.918 | 3.58  | 3.086 | 2.021  | 0.987  | 0.334   | 0.167    |
